# Supplementary material for: CcpA Regulates Staphylococcus aureus Biofilm Formation through Direct Repression of Staphylokinase Expression
Source: MDPI journal article supplement (doi:10.3390/antibiotics11101426), 2022-10-17
Supplement: s1 [file s1]

**Table S3.** Primers used in this study.

| Primers       | Sequence(5'-3')                                                    | Function                                  |
|---------------|--------------------------------------------------------------------|-------------------------------------------|
| ccpA-LAF      | CCGGAATTCTAGTACAACCTAGAATTGCAAC                                    | For <i>ccpA</i> deletion                  |
| ccpA-LAR      | CGGGGTACCATTCACAAAATTAGGCATT                                       | For <i>ccpA</i> deletion                  |
| ccpA-RAF      | CGCGGATCCAATTTCTCCTTGTA                                            | For <i>ccpA</i> deletion                  |
| ccpA-RAR      | GCGGTCGACACGTGGTTATCTGCTAC                                         | For <i>ccpA</i> deletion                  |
| ccpA-LUF      | ACAATATCGATTTTCATGACCAACAT                                         | For $\Delta$ <i>ccpA</i> identification   |
| ccpA-RDR      | GCGAAATCGTAAATCCAAATGAT                                            | For $\Delta$ <i>ccpA</i> identification   |
| ccpA-InF      | CTCGGTATTCAATTCTGTGAGGTA                                           | For $\Delta$ <i>ccpA</i> identification   |
| ccpA-InR      | ATGATGTAGCAAGAGAAGCGC                                              | For $\Delta$ <i>ccpA</i> identification   |
| pLlccpA-F     | CGGGGTACCTTATTTGTAGTTCCTCGGTA                                      | For <i>ccpA</i> complementation           |
| pLlccpA-R     | CCGGTCGACTATTCCAAGGAACTATAGACT                                     | For <i>ccpA</i> complementation           |
| pETccpA-F     | CGCGGATCCATGACAGTTACTATATATGATGT                                   | For <i>ccpA</i> production                |
| pETccpA-R     | CCGGTCGACTTATTTGTAGTTCCTCGGT                                       | For <i>ccpA</i> production                |
| sak-LAF       | AGTGCAGCGGAATTCGAGCTTACACACTTTTTTTCAAACG                           | For <i>sak</i> deletion                   |
| sak-LAR       | AGGAAGCGCCAACAAAATAGTTGTTTATTATAGAAAGC                             | For <i>sak</i> deletion                   |
| sak-RAF       | CTATTTTGTGGCGCTTCCTCCAAATATAAT                                     | For <i>sak</i> deletion                   |
| sak-RAR       | CCTGCAGGTCGACTCTAGAGGTAGATATATTGATTTTGACGGTTG                      | For <i>sak</i> deletion                   |
| sak-LUF       | TATGAATAGATGAAAATTTGAACAC                                          | For $\Delta$ <i>sak</i> identification    |
| sak-RDR       | CATTTTGGGTAGCGATATTGTC                                             | For $\Delta$ <i>sak</i> identification    |
| sak-InF       | AATGAGGTAAGTGCATCAAGTTC                                            | For $\Delta$ <i>sak</i> identification    |
| sak-InR       | TTGTAATTAAGTTGAATCCAGGGT                                           | For $\Delta$ <i>sak</i> identification    |
| pLIsak-F      | CGTCTTCAAGAATTCGAGCTTTCTTAGGTTAAATGTTAAATATT<br>GTTAATTATTTTTTAATG | For <i>sak</i> complementation            |
| pLIsak-R      | CCTGCAGGTCGACTCTAGAGTTATTTCTTTTCTATAACAACCTTTG                     | For <i>sak</i> complementation            |
| pOSPsak-F     | AGCCTTAAAGACGATCCGGGTCTTAGGTTAAATGTTAAATAT                         | For <i>Psak-lacZ</i> fusion reporter      |
| pOSPsak-R     | TCACGACGTTGTAAACGACACTTCTTTGAGCATGGCGCTTC                          | For <i>Psak-lacZ</i> fusion reporter      |
| B-Psak1-EMSAF | Biotin-TGCAAGTAAAATAACAGTTGGAAG                                    | For biotin-labeled <i>PsakI</i> synthesis |
| Psak1-EMSAF   | TGCAAGTAAAATAACAGTTGGAAG                                           | For unlabeled <i>PsakI</i> synthesis      |
| B-Psak-EMSAF  | Biotin-TTCTTAGGTTAAATGTTAAATAT                                     | For biotin-labeled <i>Psak</i> synthesis  |
| Psak-EMSAF    | TTCTTAGGTTAAATGTTAAATAT                                            | For unlabeled <i>Psak</i> synthesis       |
| Psak-EMSAR    | GGCGCTTCCTCCAAATATAATA                                             | For <i>PsakI/Psak</i> synthesis           |
| sak-RTqF      | TAAACCTGGGACTACACTTACA                                             | For RT-qPCR analysis of <i>sak</i>        |
| sak-RTqR      | CGCTTGGATCTAATTCAACTACT                                            | For RT-qPCR analysis of <i>sak</i>        |
| gyrA-RTqF     | TGGTTCAATGGATGGAGATGGC                                             | For RT-qPCR analysis of <i>gyrA</i>       |
| gyrA-RTqR     | AGACTGACGGCTCTCTTTCA                                               | For RT-qPCR analysis of <i>gyrA</i>       |
