# Supplementary material for: CcpA Regulates Staphylococcus aureus Biofilm Formation through Direct Repression of Staphylokinase Expression
Source: MDPI journal article supplement (doi:10.3390/antibiotics11101426), 2022-10-17
Supplement: s1 [file s1]

**Table S2.** Bacterial strains and plasmids used in this study.

| Strains/plasmids               | Characteristics <sup>a</sup>                                                                       | Source/reference |
|--------------------------------|----------------------------------------------------------------------------------------------------|------------------|
| Strains                        |                                                                                                    |                  |
| <i>S. aureus</i> strain        |                                                                                                    |                  |
| RN4220                         |                                                                                                    | [40]             |
| XN108                          |                                                                                                    | [20]             |
|                                | Restriction deficient cloning host                                                                 |                  |
| $\Delta ccpA$                  | A vancomycin-intermediate strain isolated from a steam-burned patient                              | This work        |
| $\Delta ccpA/pLIccpA$          | XN108 derivative with gene <i>ccpA</i> seamless deleted                                            | This work        |
| $\Delta ccpA/pLI50$            | $\Delta ccpA$ complemented with gene <i>ccpA</i> , Cm <sup>r</sup>                                 | This work        |
| $\Delta ccpA\Delta sak$        | $\Delta ccpA$ complemented with empty vector, Cm <sup>r</sup>                                      | This work        |
| $\Delta ccpA\Delta sak/pLIsak$ | $\Delta ccpA$ derivative with gene <i>sak</i> seamless deleted                                     | This work        |
| $\Delta ccpA\Delta sak/pLI50$  | $\Delta ccpA\Delta sak$ complemented with gene <i>sak</i> , Cm <sup>r</sup>                        | This work        |
| XN108/pOSPsak                  | $\Delta ccpA\Delta sak$ complemented with empty vector, Cm <sup>r</sup>                            | This work        |
| $\Delta ccpA/pOSPsak$          | XN108 derivative with plasmid pOSPsak, Cm <sup>r</sup>                                             | This work        |
| <i>E. coli</i> strain          | $\Delta ccpA$ derivative with plasmid pOSPsak, Cm <sup>r</sup>                                     |                  |
| DH5 $\alpha$                   |                                                                                                    | Tiagen           |
| BL21(DE3)                      | Cloning host for maintaining recombinant plasmids                                                  | Tiagen           |
| BL21(DE3)/pETccpA              | Expression host for exogenous protein production                                                   | This work        |
|                                | Expression host for CcpA production, Kan <sup>r</sup>                                              |                  |
| Plasmids                       |                                                                                                    |                  |
| pBT2                           | Shuttle vector, temperature sensitive, Amp <sup>r</sup> and Cm <sup>r</sup>                        | [40]             |
| pBT $\Delta ccpA$              | pBT2 derivative for <i>ccpA</i> deletion, Amp <sup>r</sup> and Cm <sup>r</sup>                     | This work        |
| pBT $\Delta sak$               | pBT2 derivative for <i>sak</i> deletion, Amp <sup>r</sup> and Cm <sup>r</sup>                      | This work        |
| pLI50                          | Expression vector, Amp <sup>r</sup> and Cm <sup>r</sup>                                            | [40]             |
| pLIccpA                        | pLI50 derivative for <i>ccpA</i> complementation, Amp <sup>r</sup> and Cm <sup>r</sup>             | This work        |
| pLIsak                         | pLI50 derivative for <i>sak</i> complementation, Amp <sup>r</sup> and Cm <sup>r</sup>              | This work        |
| pOS1                           | Reporter vector with <i>lacZ</i> coding sequence for $\beta$ -galactosidase assay, Cm <sup>r</sup> | [40]             |
|                                | pOS1 derivative with <i>lacZ</i> under the control of <i>sak</i> promoter, Cm <sup>r</sup>         |                  |
| pOSPsak                        | Expression vector, Kan <sup>r</sup>                                                                | This work        |
|                                | Expression vector for CcpA production, Kan <sup>r</sup>                                            |                  |
| pET28a                         |                                                                                                    | [39]             |
| pETccpA                        |                                                                                                    | This work        |

a. Cm<sup>r</sup>, chloramphenicol resistant; Kan<sup>r</sup>, kanamycin resistant; Amp<sup>r</sup>, ampicillin resistant.

## References

- 40 Rao, Y.; Peng, H.; Shang, W.; Hu, Z.; Yang, Y.; Tan, L.; Li, M.; Zhou, R.; Rao, X. A vancomycin resistance-associated WalK(S221P) mutation attenuates the virulence of vancomycin-intermediate *Staphylococcus aureus*. *J. Adv. Res.* **2022**, *40*, 167-178.
- 20 Zhang, X.; Hu, Q.; Yuan, W.; Shang, W.; Cheng, H.; Yuan, J.; Zhu, J.; Hu, Z.; Li, S.; Chen, W.; et al. First report of a sequence type 239 vancomycin-intermediate *Staphylococcus aureus* isolate in Mainland China. *Diagn. Microbiol. Infect. Dis.* **2013**, *77*, 64-68
- 39 Shang, W.; Rao, Y.; Zheng, Y.; Yang, Y.; Hu, Q.; Hu, Z.; Yuan, J.; Peng, H.; Xiong, K.; Tan, L.; Li, S.; Zhu, J.; Li, M.; Hu, X.; Mao, X.; Rao, X.  $\beta$ -Lactam Antibiotics Enhance the Pathogenicity of Methicillin-Resistant *Staphylococcus aureus* via SarA-Controlled Lipoprotein-Like Cluster Expression. *mBio.* **2019**, *10*, e00880-19.
